# Supplementary material for: The Impact of Fermentation Temperature and Cap Management on Selected Volatile Compounds and Temporal Sensory Characteristics of Grenache Wines from the Central Coast of California
Source: MDPI journal article supplement (doi:10.3390/molecules28104230), 2023-05-22
Supplement: s1 [file s1]

**Supplemental Table S1.** Two-way analysis of variance (ANOVA) for the main effects fermentation temperature and cap management with interaction showing the mean separation and *p*-values of descriptive sensory attributes of Grenache wines assessed by a trained panel (n = 8).

|                                                  | Saturation          | Purple hue        | Overall<br>Aroma<br>Intensity | Reduction         | Rose         | Red<br>fruit | Tropical<br>fruit | White<br>pepper | Mushroom     | Hot          |
|--------------------------------------------------|---------------------|-------------------|-------------------------------|-------------------|--------------|--------------|-------------------|-----------------|--------------|--------------|
| <b>Fermentation Temperature</b>                  |                     |                   |                               |                   |              |              |                   |                 |              |              |
| Cold                                             | 2.95 c <sup>1</sup> | 4.69 c            | 7.71 a                        | 4.31 a            | 5.12 a       | 5.30 a       | 4.74 a            | 3.26 ab         | 2.84 a       | 6.31 a       |
| Cold/Hot                                         | 6.47 b              | 6.92 b            | 8.01 a                        | 4.54 a            | 4.89 a       | 5.43 a       | 5.11 a            | 3.50 a          | 2.97 a       | 6.52 a       |
| Hot                                              | 7.25 a              | 8.44 a            | 7.50 a                        | 3.92 a            | 4.80 a       | 5.57 a       | 4.80 a            | 3.01 b          | 2.82 a       | 6.57 a       |
| <i>p</i> -value <sup>2</sup>                     | <b>&lt;0.0001</b>   | <b>&lt;0.0001</b> | 0.199                         | 0.208             | 0.488        | 0.682        | 0.372             | 0.123           | 0.836        | 0.724        |
| <b>Cap Management</b>                            |                     |                   |                               |                   |              |              |                   |                 |              |              |
| PD                                               | 5.44 a              | 6.74 a            | 7.59 a                        | 3.50 b            | 5.18 a       | 5.56 a       | 4.91 a            | 3.17 a          | 2.63 b       | 6.80 a       |
| No PD                                            | 5.68 a              | 6.62 a            | 7.89 a                        | 5.02 a            | 4.69 b       | 5.39 a       | 4.85 a            | 3.34 a          | 3.13 a       | 6.14 b       |
| <i>p</i> -value                                  | 0.358               | 0.707             | 0.195                         | <b>&lt;0.0001</b> | <b>0.031</b> | 0.295        | 0.795             | 0.376           | <b>0.019</b> | <b>0.018</b> |
| <b>Fermentation Temperature × Cap Management</b> |                     |                   |                               |                   |              |              |                   |                 |              |              |
| <i>p</i> -value                                  | <b>&lt;0.0001</b>   | <b>&lt;0.0001</b> | 0.291                         | <b>&lt;0.0001</b> | 0.058        | 0.744        | 0.386             | 0.326           | 0.144        | 0.261        |

<sup>1</sup>Different letters within columns indicate a significant difference for Fisher's least significant difference test ( $p < 0.05$ ).

<sup>2</sup>Significant *p*-values are shown in bold fonts.

**Supplemental Table S2.** Two-way analysis of variance (ANOVA) for the main effects fermentation temperature and cap management with interaction showing the mean separation and *p*-values of the phenolic composition of Grenache wines. Values represent the mean of three replicates followed by the standard error of the mean (n = 3).

|                                                  | Anthocyanins<br>(mg/L malvidin-<br>3-glucoside) | SPP               | LPP            | TPP               | Total Tannins<br>(mg/L CE) | Total Phenolics<br>(mg/L CE) |
|--------------------------------------------------|-------------------------------------------------|-------------------|----------------|-------------------|----------------------------|------------------------------|
| <b>Fermentation Temperature</b>                  |                                                 |                   |                |                   |                            |                              |
| Cold                                             | 182 ± 5.57 b <sup>1</sup>                       | 0.456 ± 0.02 c    | 0.015 ± 0.01 c | 0.471 ± 0.03 c    | 24.6 ± 2.61 b              | 500 ± 18.6 b                 |
| Cold/Hot                                         | 294 ± 7.70 a                                    | 0.668 ± 0.01 b    | 0.046 ± 0.02 b | 0.714 ± 0.02 b    | 91.3 ± 7.56 a              | 831 ± 25.7 a                 |
| Hot                                              | 260 ± 25.6 a                                    | 0.756 ± 0.03 a    | 0.147 ± 0.03 a | 0.903 ± 0.03 a    | 88.9 ± 10.8 a              | 814 ± 62.1 a                 |
| <b><i>p</i>-value<sup>2</sup></b>                | <b>0.001</b>                                    | <b>&lt;0.0001</b> | <b>0.004</b>   | <b>&lt;0.0001</b> | <b>&lt;0.0001</b>          | <b>&lt;0.0001</b>            |
| <b>Cap Management</b>                            |                                                 |                   |                |                   |                            |                              |
| PD                                               | 229 ± 14.0 a                                    | 0.618 ± 0.04 a    | 0.102 ± 0.03 a | 0.720 ± 0.06 a    | 72.7 ± 12.4 a              | 674 ± 49.5 a                 |
| No PD                                            | 262 ± 24.4 a                                    | 0.635 ± 0.05 a    | 0.037 ± 0.02 a | 0.672 ± 0.07 a    | 63.8 ± 12.5 a              | 754 ± 71.0 a                 |
| <b><i>p</i>-value</b>                            | <b>0.260</b>                                    | <b>0.801</b>      | <b>0.085</b>   | <b>0.615</b>      | <b>0.620</b>               | <b>0.366</b>                 |
| <b>Fermentation Temperature × Cap Management</b> |                                                 |                   |                |                   |                            |                              |
| <b><i>p</i>-value</b>                            | <b>0.001</b>                                    | <b>&lt;0.0001</b> | <b>0.001</b>   | <b>&lt;0.0001</b> | <b>0.001</b>               | <b>0.000</b>                 |

<sup>1</sup>Different letters within columns indicate a significant difference for Fisher's least significant difference test (*p* < 0.05).

<sup>2</sup>Significant *p*-values are shown in bold fonts.

**Supplemental Table S3.** Two-way analysis of variance (ANOVA) for the main effects fermentation temperature and cap management with interaction showing the mean separation and *p*-values for the concentration of volatile compounds (µg/L) in Grenache wines. Values represent the mean of three replicates (n=3).

| Compounds           | Temperature         |                   |           |                           | Cap Management |          |                   | Temperature x Cap Management |
|---------------------|---------------------|-------------------|-----------|---------------------------|----------------|----------|-------------------|------------------------------|
|                     | Cold                | Cold/Hot          | Hot       | <i>p</i> -value           | PD             | No PD    | <i>p</i> -value   | <i>p</i> -value              |
| Esters              |                     |                   |           |                           |                |          |                   |                              |
| Isobutyl acetate    | 17.0 b <sup>1</sup> | n.d. <sup>2</sup> | 105 a     | <b>0.001</b> <sup>3</sup> | 23.2 a         | 58.5 a   | 0.227             | <b>0.002</b>                 |
| Ethyl butyrate      | 166 b               | 213 a             | 164 b     | <b>0.012</b>              | 170 a          | 192 a    | 0.194             | <b>0.002</b>                 |
| Hexyl acetate       | 4.60 a              | 4.99 a            | n.d.      | <b>0.000</b>              | 3.74 a         | 2.66 a   | 0.426             | <b>0.000</b>                 |
| Isoamyl acetate     | 739 b               | 992 a             | 805 ab    | 0.073                     | 728 b          | 963 a    | <b>0.009</b>      | <b>0.001</b>                 |
| Ethyl hexanoate     | 577 a               | 650 a             | 465 b     | <b>0.001</b>              | 561 a          | 567 a    | 0.910             | <b>0.002</b>                 |
| Ethyl lactate       | 24,410 a            | 29,864 a          | 30,873 a  | 0.358                     | 28,190 a       | 28,575 a | 0.924             | 0.365                        |
| Ethyl heptanoate    | 0.497 a             | 0.232 a           | 0.427 a   | 0.783                     | 0.771 a        | n.d.     | <b>0.006</b>      | 0.165                        |
| Ethyl octanoate     | 322 b               | 472 a             | 315 b     | <b>0.006</b>              | 370 a          | 370 a    | 0.995             | <b>0.021</b>                 |
| Ethyl decanoate     | 9.50 a              | 11.5 a            | 7.49 a    | 0.453                     | 10.3 a         | 8.70 a   | 0.539             | 0.771                        |
| Diethyl succinate   | 327 b               | 387 b             | 719 a     | <b>0.015</b>              | 528 a          | 427 a    | 0.448             | <b>0.043</b>                 |
| Ethyl hexadecanoate | 505 a               | 301 a             | 696 a     | 0.150                     | 477 a          | 524 a    | 0.785             | 0.234                        |
| Phenylethyl acetate | 9.56 a              | 10.7 a            | 11.3 a    | 0.887                     | 7.00 b         | 14.0 a   | <b>0.006</b>      | 0.081                        |
| Ethyl cinnamate     | 1.51 a              | 1.73 a            | 2.14 a    | 0.158                     | 1.54 a         | 2.05 a   | 0.057             | 0.142                        |
| Total Esters        | 27,089 a            | 32,907 a          | 34,163 a  | 0.328                     | 31,070 a       | 31,703 a | 0.881             | 0.340                        |
| Nor-isoprenoids     |                     |                   |           |                           |                |          |                   |                              |
| β-damascenone       | 0.719 a             | n.d.              | n.d.      | <b>0.002</b>              | 0.252 a        | 0.227 a  | 0.912             | <b>0.050</b>                 |
| Terpenes            |                     |                   |           |                           |                |          |                   |                              |
| Citronellol         | 14.8 a              | 11.5 b            | 13.8 a    | <b>0.006</b>              | 13.2 a         | 13.6 a   | 0.697             | 0.057                        |
| Alcohols            |                     |                   |           |                           |                |          |                   |                              |
| 1-hexanol           | 1878 a              | 2107 a            | 2054 a    | 0.743                     | 2453 a         | 1573 b   | <b>&lt;0.0001</b> | <b>0.000</b>                 |
| 1-octanol           | n.d.                | 0.870 a           | 0.988 a   | 0.614                     | 1.24 a         | n.d.     | 0.151             | 0.570                        |
| 1-nonanol           | 0.486 a             | 0.796 a           | n.d.      | 0.402                     | 0.550 a        | 0.305 a  | 0.618             | 0.692                        |
| Isobutanol          | 9,792 ab            | 7,361 b           | 12,566 a  | <b>0.011</b>              | 9,458 a        | 10,356 a | 0.573             | <b>0.047</b>                 |
| Isoamyl alcohol     | 49,693 a            | 48,182 a          | 57,983 a  | 0.669                     | 53,742 a       | 50,163 a | 0.708             | 0.494                        |
| Phenylethyl alcohol | 15,442 c            | 20,007 b          | 29,088 a  | <b>&lt;0.0001</b>         | 20,242 a       | 22,783 a | 0.421             | <b>&lt;0.0001</b>            |
| Total Alcohols      | 76,805. a           | 77,659 a          | 101,692 a | 0.093                     | 85,897 a       | 84,874 a | 0.927             | 0.251                        |
| Aldehydes           |                     |                   |           |                           |                |          |                   |                              |
| Benzaldehyde        | 19.0 a              | 22.9 a            | 6.19 a    | 0.471                     | 15.3 a         | 16.7 a   | 0.905             | 0.767                        |

<sup>1</sup>Different letters within columns indicate a significant difference for Fisher's least significant differences test (*p* < 0.05).

<sup>2</sup>Compound not detected during analysis.

<sup>3</sup>Significant *p*-values are shown in bold fonts.

**Supplemental Table S4.** Two-way analysis of variance (ANOVA) for the main effects fermentation temperature and cap management with interaction showing the mean separation and *p*-values of basic chemical composition of Grenache wines. Values represent the mean of three replicates followed by the standard error of the mean (n = 3).

|                                                  | Ethanol<br>(v/v%)          | pH            | Titrateable<br>acidity (g/L) | Acetic acid (g/L) | Glucose + Fructose<br>(g/L) | Lactic acid<br>(g/L) | Malic acid<br>(g/L) |
|--------------------------------------------------|----------------------------|---------------|------------------------------|-------------------|-----------------------------|----------------------|---------------------|
| <b>Fermentation Temperature</b>                  |                            |               |                              |                   |                             |                      |                     |
| Cold                                             | 13.2 ± 0.13 a <sup>1</sup> | 3.65 ± 0.03 a | 5.59 ± 0.07 b                | 0.323 ± 0.03 a    | 0.133 ± 0.01 a              | 1.21 ± 0.02 a        | 0.060 ± 0.01 a      |
| Cold/Hot                                         | 12.9 ± 0.09 a              | 3.54 ± 0.01 b | 5.85 ± 0.05 a                | 0.178 ± 0.01 b    | 0.132 ± 0.01 a              | 1.25 ± 0.01 a        | 0.045 ± 0.01 b      |
| Hot                                              | 13.0 ± 0.12 a              | 3.57 ± 0.03 b | 6.03 ± 0.09 a                | 0.282 ± 0.01 a    | 0.108 ± 0.01 a              | 1.12 ± 0.03 b        | 0.045 ± 0.01 b      |
| <i>p</i> -value <sup>2</sup>                     | 0.306                      | <b>0.009</b>  | <b>0.003</b>                 | <b>0.001</b>      | 0.221                       | <b>0.002</b>         | 0.069               |
| <b>Cap Management</b>                            |                            |               |                              |                   |                             |                      |                     |
| PD                                               | 13.1 ± 0.08 a              | 3.56 ± 0.02 a | 5.71 ± 0.07 b                | 0.244 ± 0.02 a    | 0.117 ± 0.01 a              | 1.21 ± 0.02 a        | 0.051 ± 0.01 a      |
| No PD                                            | 12.9 ± 0.09 a              | 3.62 ± 0.02 a | 5.94 ± 0.08 a                | 0.278 ± 0.03 a    | 0.132 ± 0.01 a              | 1.17 ± 0.03 a        | 0.049 ± 0.01 a      |
| <i>p</i> -value                                  | 0.057                      | 0.073         | <b>0.046</b>                 | 0.393             | 0.241                       | 0.305                | 0.734               |
| <b>Fermentation Temperature × Cap Management</b> |                            |               |                              |                   |                             |                      |                     |
| <i>p</i> -value                                  | 0.300                      | <b>0.004</b>  | <b>0.001</b>                 | <b>0.001</b>      | 0.194                       | <b>0.011</b>         | 0.318               |

<sup>1</sup>Different letters within columns indicate a significant difference for Fisher's least significant difference test (*p* < 0.05).

<sup>2</sup>Significant *p* values are shown in bold fonts.

**Supplemental Table S5.** One-way analysis of variance (ANOVA) of the saliva (mL/min) for each panelist. Values represent the mean of three salivary flow rate replicates followed by the standard error of the mean (n = 3).

| Panelist Code                | Salivary flow rate (mL/min) |
|------------------------------|-----------------------------|
| 325                          | 3.18 ± 0.19 a <sup>1</sup>  |
| 193                          | 3.02 ± 0.04 ab              |
| 244                          | 2.88 ± 0.11 abc             |
| 368                          | 2.83 ± 0.10 abc             |
| 715                          | 2.71 ± 0.06 bc              |
| 837                          | 2.53 ± 0.10 c               |
| 783                          | 1.58 ± 0.29 d               |
| 442                          | 1.39 ± 0.11 d               |
| <i>p</i> -value <sup>2</sup> | <b>&lt;0.0001</b>           |

<sup>1</sup>Different letters within the same column indicate a significant difference for Fisher's least significant difference test ( $p < 0.05$ ).

<sup>2</sup>Significant *p*-values are shown in bold fonts.

**Supplemental Table S6.** One-way analysis of variance (ANOVA) of time to onset of perception for astringency subqualities (suede, velvet) and retronasal fruit compared to salivary flow rate (mL/min).

| Salivary Flow Rate<br>(mL/min) | Time of first suede<br>perception (sec) | Time of first velvet<br>perception (sec) | Time of fruit perception (sec) |
|--------------------------------|-----------------------------------------|------------------------------------------|--------------------------------|
| LF                             | 12.1 a <sup>1</sup>                     | 5.05 a                                   | 6.88 a                         |
| HF                             | 8.70 b                                  | 4.76 a                                   | 6.33 a                         |
| <i>p</i> -value <sup>2</sup>   | <b>0.001</b>                            | 0.749                                    | 0.500                          |

<sup>1</sup>Different letters within columns indicate a significant difference for Fisher's least significant difference test,  $p < 0.05$ .

<sup>2</sup>Significant *p*-values are shown in bold fonts.

**Supplemental Table S7.** Compounds evaluated using SPME and SBSE on the GC-MS, CAS numbers, manufacturers, and purity.

| Compound                 | CAS Number | Manufacturer     | Purity |
|--------------------------|------------|------------------|--------|
| <b>Esters</b>            |            |                  |        |
| Isobutyl acetate         | 110-19-0   | TCI              | 99%    |
| Ethyl isobutyrate        | 97-62-1    | Alfa Aesar       | 98%    |
| Ethyl butyrate           | 105-54-5   | Alfa Aesar       | 99%    |
| Ethyl propionate         | 105-37-3   | TCI              | 99%    |
| Isoamyl acetate          | 123-92-2   | Acros Organics   | 99%    |
| Hexyl acetate            | 142-92-7   | Sigma Aldrich    | 98.5%  |
| Ethyl hexanoate          | 123-66-0   | TCI              | 99%    |
| Ethyl heptanoate         | 106-30-9   | Sigma Aldrich    | 99%    |
| Ethyl octanoate          | 106-32-1   | TCI              | 98%    |
| Ethyl decanoate          | 110-38-3   | TCI              | 98%    |
| Diethyl succinate        | 123-25-1   | Sigma Aldrich    | 99.5%  |
| Ethyl hexadecanoate      | 56219-10-4 | TCI              | 95%    |
| Phenylethyl acetate      | 103-45-7   | Sigma Aldrich    | 99%    |
| Ethyl cinnamate          | 4192-77-2  | TCI              | 99%    |
| Ethyl lactate            | 97-64-3    | Spectrum         | 98%    |
| <b>Nor-isoprenoids</b>   |            |                  |        |
| $\beta$ -damascenone     | 23726-91-2 | Sigma Aldrich    | 90%    |
| $\beta$ -ionone          | 14901-07-6 | Sigma Aldrich    | 96%    |
| <b>Terpenes</b>          |            |                  |        |
| Citronellol              | 7540-51-4  | Sigma Aldrich    | 95%    |
| trans-farnesol           | 4602-84-0  | Sigma Aldrich    | 96%    |
| <b>Alcohols</b>          |            |                  |        |
| 1-hexanol                | 111-27-3   | Sigma Aldrich    | 99%    |
| 1-octanol                | 111-87-5   | Sigma Aldrich    | 99%    |
| 1-nonanol                | 143-08-8   | Sigma Aldrich    | 98%    |
| Isoamyl alcohol          | 123-51-3   | Sigma Aldrich    | 95%    |
| Isobutanol               | 78-83-1    | Fischer Chemical | 95%    |
| Phenylethyl alcohol      | 98-85-1    | Acros Organics   | 98%    |
| <b>Aldehydes</b>         |            |                  |        |
| Benzaldehyde             | 10-52-7    | Sigma Aldrich    | 99%    |
| <b>Sulfur Compounds</b>  |            |                  |        |
| Methionol                | 505-10-2   | Sigma Aldrich    | 98%    |
| <b>Internal Standard</b> |            |                  |        |
| 2-undecanone             | 112-12-9   | Sigma Aldrich    | 98%    |

**Supplemental Table S8.** Selected volatile compounds for stir bar sorptive extraction (SBSE) and solid-phase microextraction (SPME) analysis with concentration in wine according to the literature ( $\mu\text{g/L}$ ), volume added to wine ( $\mu\text{L}$ ), and concentration in model wine ( $\mu\text{g/L}$ ).

| Stock Solution | Volatile Compound                | Typical Concentration in Wine ( $\mu\text{g/L}$ ) | Source | Volume added to model wine ( $\mu\text{L}$ ) | Concentration in model wine ( $\mu\text{g/L}$ ) | Qualifying ions (m/z) |
|----------------|----------------------------------|---------------------------------------------------|--------|----------------------------------------------|-------------------------------------------------|-----------------------|
| 1              | Trans-farnesol <sup>1</sup>      | 0.7 - 2.4                                         | [83]   | 2                                            | 1.7                                             | 69,81,107             |
| 2              | Ethyl heptanoate                 | 5.50                                              | [64]   | 5                                            | 4.63                                            | 70,88,113             |
|                | 1-nonanol                        | 9.01                                              | [84]   | 5                                            | 4.05                                            | 56,83                 |
|                | 1-octanol                        | 10                                                | [64]   | 5                                            | 4.09                                            | 70, 84                |
| 3              | Hexyl acetate                    | 200                                               | [85]   | 140                                          | 121                                             | 56,69                 |
| 4              | Ethyl isobutyrate <sup>1</sup>   | 200                                               | [86]   | 200                                          | 170                                             | 71,88,116             |
|                | $\beta$ -ionone <sup>1</sup>     | 240                                               | [84]   | 200                                          | 181                                             | 91,135,177            |
|                | Methionol <sup>1</sup>           | 3.70 -207                                         | [87]   | 200                                          | 196                                             | 97, 126               |
| 5              | $\beta$ -damascenone             | 425                                               | [88]   | 450                                          | 378                                             | 123, 192              |
|                | Ethyl propionate <sup>1</sup>    | 301- 489                                          | [87]   | 450                                          | 396                                             | 57,75, 102            |
|                | Diethyl succinate                | 500                                               | [89]   | 450                                          | 468                                             | 73, 101, 129          |
| 6              | Benzaldehyde                     | 5 - 660                                           | [90]   | 600                                          | 618                                             | 51, 77,106            |
|                | Isobutyl acetate                 | 665                                               | [88]   | 600                                          | 517                                             | 73, 86                |
| 7              | Ethyl cinnamate                  | 825                                               | [88]   | 750                                          | 780                                             | 103, 176              |
|                | Ethyl decanoate                  | 931                                               | [88]   | 750                                          | 632                                             | 101, 115, 155         |
| 8              | Ethyl butyrate                   | 1,456                                             | [88]   | 1,000                                        | 870                                             | 68, 71,88             |
|                | 2-phenylethyl acetate            | 1,500                                             | [88]   | 1,000                                        | 991                                             | 104, 91,78            |
|                | $\beta$ -citronellol             | 1,563                                             | [88]   | 1,000                                        | 843                                             | 69, 81,95             |
|                | Isoamyl acetate                  | 500 -1,619                                        | [88]   | 1,000                                        | 862                                             | 70, 87, 55            |
| 9              | Phenylethyl alcohol              | 7,838                                             | [88]   | 1,000                                        | 999                                             | 79, 107, 122          |
|                | Benzyl alcohol                   | 1,563                                             | [86]   | 1,000                                        | 1,035                                           | 51, 79, 108           |
| 10             | Ethyl n-octanoate                | 2,124                                             | [88]   | 2,000                                        | 1,723                                           | 101, 127              |
|                | 1-Hexanol                        | 2,200                                             | [88]   | 2,000                                        | 1,604                                           | 56, 84                |
|                | Ethyl Hexanoate                  | 2,356                                             | [88]   | 2,000                                        | 1,723                                           | 70, 99                |
| 11             | Ethyl hexadecanoate <sup>3</sup> | 600 – 2,410                                       | [91]   | 115 <sup>2</sup>                             | 1901                                            | 55, 83, 97            |
| 12             | Isoamyl alcohol <sup>3</sup>     | 80,000 – 300,000                                  | [92]   | 1,500 <sup>2</sup>                           | 23,085                                          | 42,55, 70             |
|                | Ethyl lactate <sup>3</sup>       | 56,800 – 80,900                                   | [93]   | 1,500 <sup>2</sup>                           | 30,372                                          | 29, 45, 75            |
| 13             | Isobutanol <sup>3</sup>          | 25,000 - 86,000                                   | [92]   | 1,500 <sup>2</sup>                           | 22,800                                          | 33, 43                |

<sup>1</sup>Compound was not detected in actual wine treatments for the present study.

<sup>2</sup>Due to high concentration in wines stock solution process was modified to a single solution of 50  $\mu\text{L}$  added to 250 mL of 95% Ethanol solution.

<sup>3</sup>Compound was analyzed using solid-phase microextraction.
